# Supplementary material
Source: PubMed Central journal article supplement (PMC3127173)
Supplement: mmc1.pdf [file mmc1.pdf]

## Transfer of arginine into lipid bilayers is non-additive

Justin L. MacCallum<sup>\*,†</sup>, W.F. Drew Bennett<sup>\*</sup>, D. Peter Tieleman<sup>\*,‡</sup>

<sup>\*</sup> Department of Biological Sciences, University of Calgary  
2500 University Dr. NW, Calgary AB T2N 1N4 Canada

<sup>†</sup> Present address: Laufer Center for Physical and Quantitative Biology,  
Stony Brook University, Stony Brook, NY 11794

<sup>‡</sup>Corresponding author:

[tieleman@ucalgary.ca](mailto:tieleman@ucalgary.ca)

Department of Biological Sciences

University of Calgary

2500 University Dr NW

Calgary AB T2N 1N4

Canada

Phone: 403-220-2966

Fax: 403-289-9311

Running Title: Transfer of arginine is non-additive

### Online Supporting information

We determined a PMF for arginine partitioning from water into a cyclohexane slab using the CHARMM27 force field (41). We ran the simulations using GROMACS 4 (64). Umbrella sampling was used to determine the PMF with parameters similar to the DOPC PMFs in the main text. Smooth particle mesh Ewald (35) was used for electrostatics with a real space cut-off of 1.2 nm, a sixth order spline and a 0.16 grid spacing. Lennard-Jones interactions were shifted from 1 nm to 1.2 nm. Temperature was maintained using the weak-coupling algorithm at 298 K (31). The x and y box dimensions were kept constant, while the pressure in the z dimension was kept at 1 bar using a weak-coupling algorithm (31).

The PMF using CHARMM and OPLS are nearly identical from water through the interface. The free energy minima at the interface are -12.9 and -12.7 kJ/mol for the OPLS and CHARMM force fields.

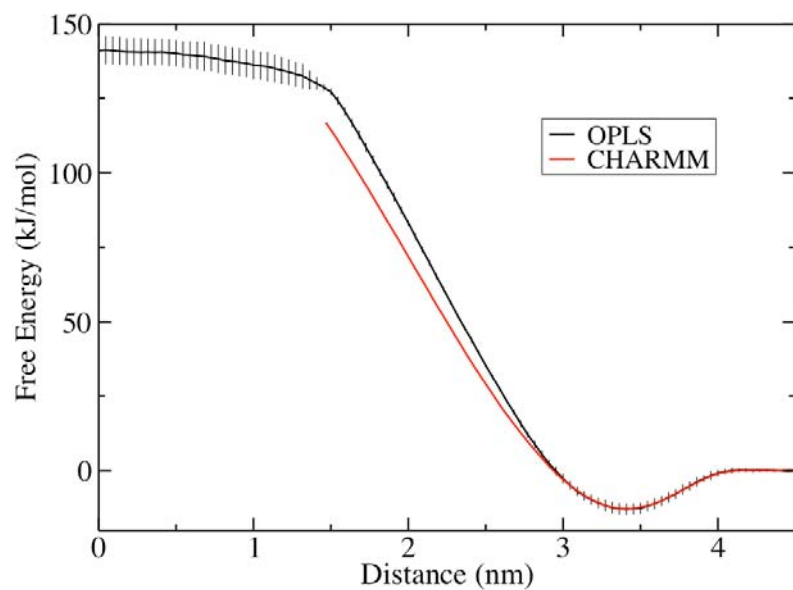

Figure S1: PMFs for moving an arginine side chain from water ( $x > 4.2$ ) into a cyclohexane slab using the CHARMM and OPLS force field. The two PMFs were set equal to zero at bulk water. For ease of comparison, the CHARMM PMF was shifted so that the minimum was at the same distance as the OPLS PMF (3.4 nm).
